# Supplementary material for: A strongly adhesive hemostatic hydrogel for the repair of arterial and heart bleeds
Source: PubMed Central journal article supplement (PMC6517429; doi:10.1038/s41467-019-10004-7), 2019-05-14
Supplement: 41467_2019_10004_MOESM11_ESM.pdf [file 41467_2019_10004_MOESM11_ESM.pdf]

Reviewers' Comments:

Reviewer #1:

Remarks to the Author:

The authors have addressed all of my feedback - the paper should be published as is.

We would like to thank the reviewers for their thoughtful and constructive comments regarding our manuscript.

Reviewer #1:

Remarks to the Author:

*The authors have addressed all of my feedback - the paper should be published as is.*

**Response:** We appreciate the reviewer's positive comments.
